# Supplementary material for: Sustained release of drug-loaded nanoparticles from injectable hydrogels enables long-term control of macrophage phenotype
Source: Royal Society of Chemistry journal article supplement (doi:10.1039/d2bm01113a), 2022-01-01
Supplement: d2bm01113a1.pdf [file d2bm01113a1.pdf]

## Supplementary Information

### **Sustained release of drug-loaded nanoparticles from injectable hydrogels enables long-term control of macrophage phenotype**

*Shreya S. Soni, Arielle M. D'Elia, Abdulrahman Alsasa, Sylvia Cho, Tina Tylek, Erin M. O'Brien,*

*Ricardo Whitaker, Kara L. Spiller, and Christopher B. Rodell\**

School of Biomedical Engineering, Science and Health Systems, Drexel University, Philadelphia, PA

\*Corresponding author. Telephone: 215-895-2068; E-mail: [christopher.b.rodell@drexel.edu](mailto:christopher.b.rodell@drexel.edu)

**Table S1.** Murine nanoString gene panel.

| <b>Gene</b> | <b>Target Identifier</b> | <b>Annotation</b> |
|-------------|--------------------------|-------------------|
| Acta2       | NM_007392.2              | ECM               |
| Angpt2      | NM_007426.3              | Angiogenesis      |
| Arg1        | NM_007482.3              | M2                |
| Axl         | NM_009465.4              | M2                |
| Bbgn        | NM_007542.4              | ECM               |
| Birc3       | NM_007464.3              | M1                |
| Ccl17       | NM_011332.2              | M2                |
| Ccl2        | NM_011333.3              | M1                |
| Ccl22       | NM_009137.2              | M2                |
| Ccl4        | NM_013652.1              | M1                |
| Ccl5        | NM_013653.1              | M1                |
| Ccn2        | NM_010217.2              | ECM               |
| Cd36        | NM_007643.3              | M1                |
| Cd38        | NM_007646.4              | M1                |
| Cd68        | NM_009853.1              | M1                |
| Cd80        | NM_009855.2              | M1                |
| Cd86        | NM_019388.3              | M1                |
| Chil3       | NM_009892.2              | M2                |
| Col1a1      | NM_007742.3              | ECM               |
| Col6a1      | NM_009933.2              | ECM               |
| Col3a1      | NM_009930.1              | ECM               |
| Csflr       | NM_001037859.1           | Immune signaling  |
| Cxcl10      | NM_021274.1              | M1                |
| Cxcl11      | NM_019494.1              | M1                |
| Cxcl12      | NM_021704.3              | Immune signaling  |
| Cxcr4       | NM_009911.3              | M1                |
| Dcn         | NM_001190451.1           | ECM               |
| Egr2        | NM_010118.2              | M2                |
| Fnl1        | NM_010233.1              | ECM               |
| H2afx       | NM_010436.2              | M1                |
| Igf1        | NM_001111274.1           | M2                |
| Il10        | NM_010548.2              | M2                |
| Il12b       | NM_001303244.1           | M1                |
| Il1a        | NM_010554.4              | M1                |
| Il1b        | NM_008361.3              | M1                |
| Il6         | NM_031168.1              | M1                |
| Irf3        | NM_016849.4              | M1                |
| Irf4        | NM_013674.1              | M2                |
| Irf5        | NM_001252382.1           | M1                |
| Jak1        | NM_146145.2              | Immune signaling  |
| Ki67        | XM_006507413.5           | M1                |
| Mer         | NM_008587.1              | M2                |
| Mmp13       | NM_008607.1              | Protease          |
| Mmp14       | NM_008608.3              | Protease          |
| Mmp2        | NM_008610.2              | Protease          |
| Mmp8        | NM_008611.4              | Protease          |
| Mmp9        | NM_013599.2              | Protease          |

|         |                |              |
|---------|----------------|--------------|
| Mrc1    | NM_008625.1    | M2           |
| Nfkab1a | NM_010907.2    | M1           |
| Nos2    | NM_010927.3    | M1           |
| Pdgfb   | NM_011057.3    | Angiogenesis |
| S100a4  | NM_011311.2    | Fibrosis     |
| Spp1    | NM_009263.3    | ECM          |
| Stat3   | NM_213659.2    | M2           |
| Stat6   | NM_009284.2    | M2           |
| Tgfb1   | NM_011577.1    | M2           |
| Timp1   | NM_011593.2    | ECM          |
| Timp3   | NM_011595.2    | ECM          |
| Tnf     | NM_013693.2    | M1           |
| Top2a   | NM_011623.2    | M1           |
| Vcan    | NM_172955.1    | ECM          |
| Vegfa   | NM_001025250.3 | Angiogenesis |
| Vim     | NM_011701.4    | ECM          |
| Hprt    | NM_013556.2    | Housekeeping |
| Tbp     | NM_013684.3    | Housekeeping |

**Table S2.** Human nanoString gene panel.

| <b>Gene</b> | <b>Target Identifier</b> | <b>Annotation</b> |
|-------------|--------------------------|-------------------|
| Acta2       | NM_001613.1:645          | ECM               |
| Aggf1       | NM_018046.3:35           | Angiogenesis      |
| Ang         | NM_001145.4:949          | M2                |
| Btg1        | NM_001731.2:775          | Immune signaling  |
| Ccl15       | NM_032965.4:869          | Angiogenesis      |
| Ccl18       | NM_002988.2:585          | M2                |
| Ccl2        | NM_002982.3:123          | M1                |
| Ccl22       | NM_002990.3:797          | M2                |
| Ccl24       | NM_002991.2:18           | M2                |
| Ccl26       | NM_006072.4:184          | M2                |
| Ccl5        | NM_002985.2:280          | Angiogenesis      |
| Ccl8        | NM_005623.2:689          | M1                |
| Ccr7        | NM_001838.2:1610         | M1                |
| Cd163       | NM_004244.4:1630         | M2                |
| Cd80        | NM_005191.3:674          | M1                |
| Clec10a     | NM_182906.2:430          | M2                |
| Col3a1      | NM_000090.3:180          | ECM               |
| Ctnnb1      | NM_001098210.1:1815      | Angiogenesis      |
| Cxcr4       | NM_003467.2:1335         | Immune signaling  |
| Egfl7       | NM_016215.3:1252         | Angiogenesis      |
| Ets1        | NM_005238.3:1305         | Angiogenesis      |
| Flt1        | NM_002019.4:530          | Angiogenesis      |
| Fnl1        | NM_212482.1:1776         | ECM               |
| Foxo1       | NM_002015.3:1526         | Angiogenesis      |
| Foxo4       | NM_001170931.1:1121      | Angiogenesis      |
| Fyn         | NM_002037.3:765          | Immune signaling  |
| Hspg1       | NM_005529.5:2715         | ECM               |

|           |                     |                  |
|-----------|---------------------|------------------|
| Ido1      | NM_002164.5:369     | M1               |
| Il1b      | NM_000576.2:840     | M1               |
| Il6       | NM_000600.3:364     | M1               |
| Jag1      | NM_000214.2:915     | Immune signaling |
| Lum       | NM_002345.3:1285    | ECM              |
| Marco     | NM_006770.3:61      | M2               |
| Mmp2      | NM_004530.2:2360    | M1               |
| Mmap9     | NM_004994.2:1530    | M2               |
| Mrc1      | NM_002438.2:525     | M2               |
| Pdgfa     | NM_002607.5:2460    | Angiogenesis     |
| Pdgfb     | NM_033016.2:1480    | Angiogenesis     |
| Pdgfc     | NM_016205.2:2596    | Angiogenesis     |
| Pdgfra    | NM_006206.3:1925    | ECM              |
| Pdgfrb    | NM_002609.3:265     | ECM              |
| Ramp1     | NM_005855.2:200     | M2               |
| Spp1      | NM_000582.2:760     | Immune signaling |
| Stat3     | NM_003150.3:2060    | Immune signaling |
| Stat6     | NM_003153.3:2030    | Immune signaling |
| Tgfb1     | NM_000660.3:1260    | ECM              |
| Tie1      | NM_005424.2:2610    | Angiogenesis     |
| Timp3     | NM_000362.4:1640    | Immune signaling |
| Tnf       | NM_000594.2:1010    | M1               |
| Tnfrsf11a | NM_003839.3:226     | M2               |
| Vcan      | NM_004385.3:9915    | ECM              |
| Vegfa     | NM_001025366.1:1325 | Angiogenesis     |
| Vegfb     | NM_003377.3:687     | Angiogenesis     |
| Vegfc     | NM_005429.2:565     | Angiogenesis     |
| Vim       | NM_003380.2:694     | ECM              |
| Wnt5a     | NM_003392.3:475     | Immune signaling |
| Gapdh     | NM_001256799.1:386  | Housekeeping     |
| Tbp       | NM_001172085.1:587  | Housekeeping     |

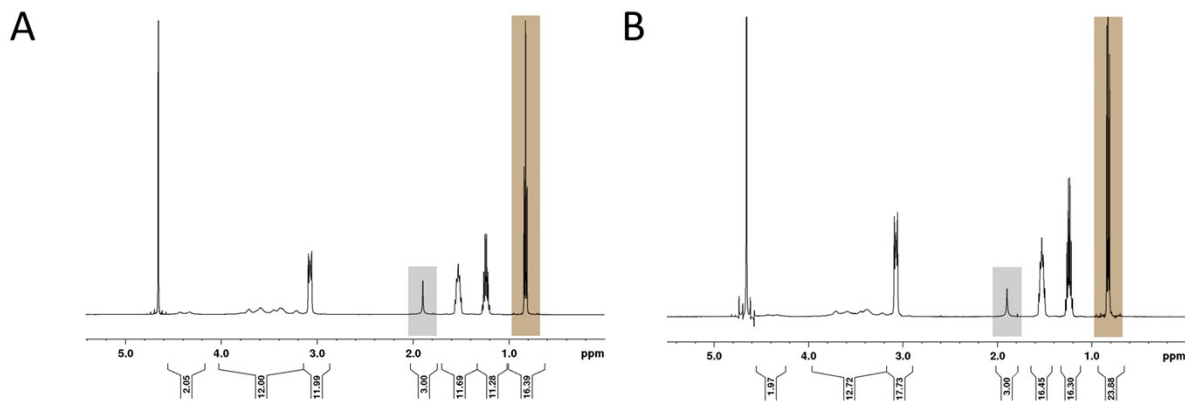

**Figure S1.** <sup>1</sup>H-NMR spectra of the tetrabutylammonium salt of (A) 82 kDa and (B) 337 kDa hyaluronic acid (HA-TBA). The ratio of TBA to HA repeat units is determined by the integration of the TBA methyl group (12H, shaded brown) relative to the N-acetyl group of HA (3H, shaded gray).

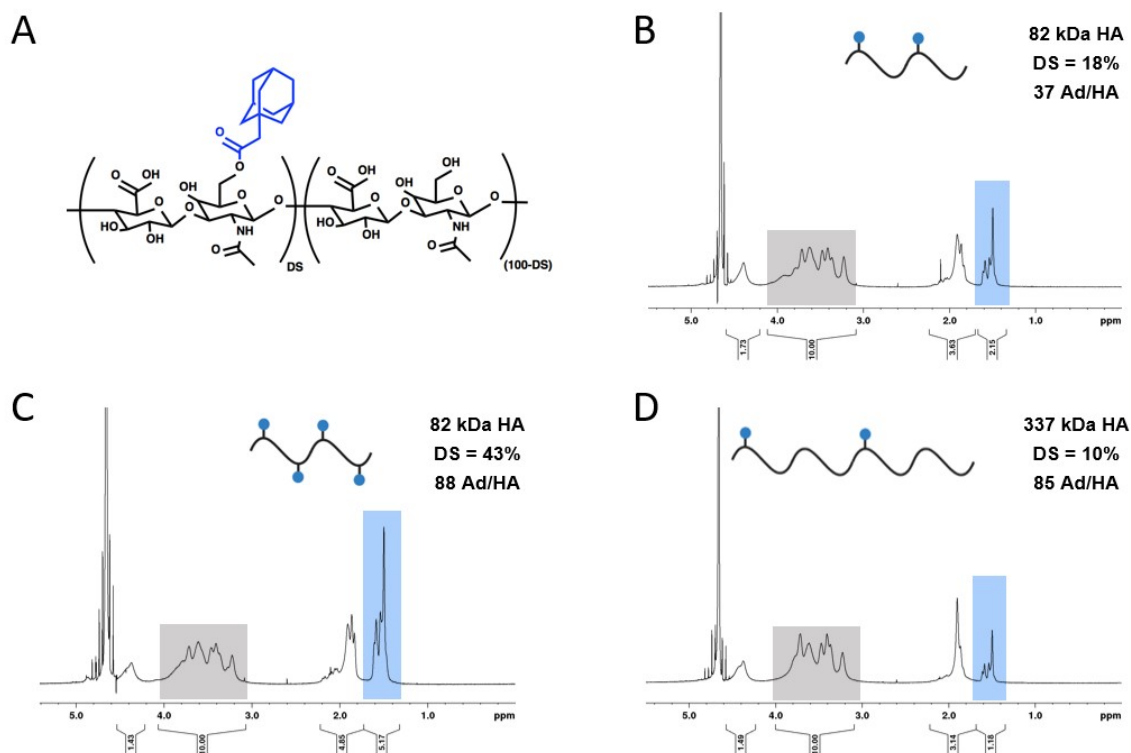

**Figure S2.** A) Chemical structure of adamantane functionalized hyaluronic acid (Ad-HA). B-D) <sup>1</sup>H-NMR spectra of Ad-HA products. The degree of substitution (DS) is determined by integration of the ethyl multiplet of adamantane (12H, shaded blue) relative to the sugar ring of HA (10H, shaded gray). For low molecular weight HA (82 kDa), a DS of 18% (B) and 43% (C) yield an average of 37 and 88 Ad per HA macromer, respectively. For high molecular weight HA (337 kDa), a DS of 10% afforded a calculated average of 85 guest groups per macromer.

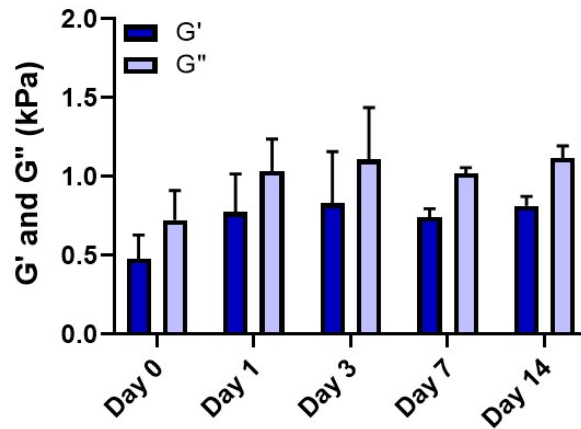

**Figure S3.** Temporal dependence of rheological properties of hydrogels composed of 82 kDa Ad-HA (Low), 1:1 ratio Ad-HA:CDNP. Time sweeps were performed at 10.0 Hz, 1.0% strain;  $G'$  (dark blue),  $G''$  (light blue); mean  $\pm$  SD,  $n = 2$ .

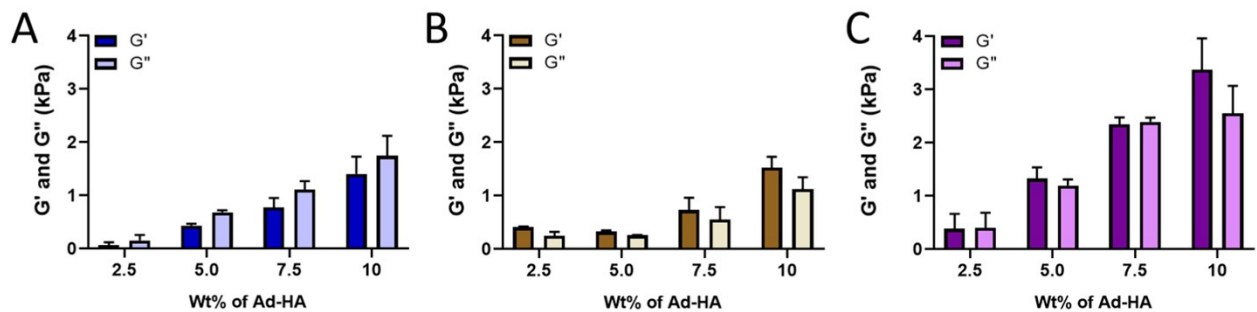

**Figure S4.** Storage ( $G'$ , darker shading) and loss ( $G''$ , lighter shading) moduli of **A)** 82 kDa Ad-HA (Low), 1:1 ratio Ad-HA:CDNP, **B)** 337 kDa Ad-HA (Low), 1:0.5 ratio Ad-HA:CDNP, and **C)** 82 kDa Ad-HA (High), 1:1.5 ratio Ad-HA:CDNP dependent on the concentration of Ad-HA. Time sweeps were performed at 10.0 Hz, 1.0% strain; mean  $\pm$  SD,  $n = 2$ .

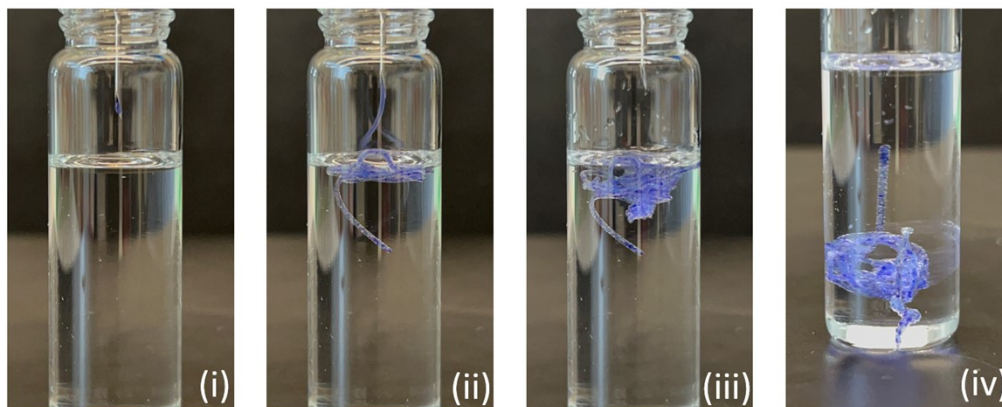

**Figure S5.** Representative images of shear-thinning hydrogel injection through a 21G needle fitted to a 1 mL syringe.

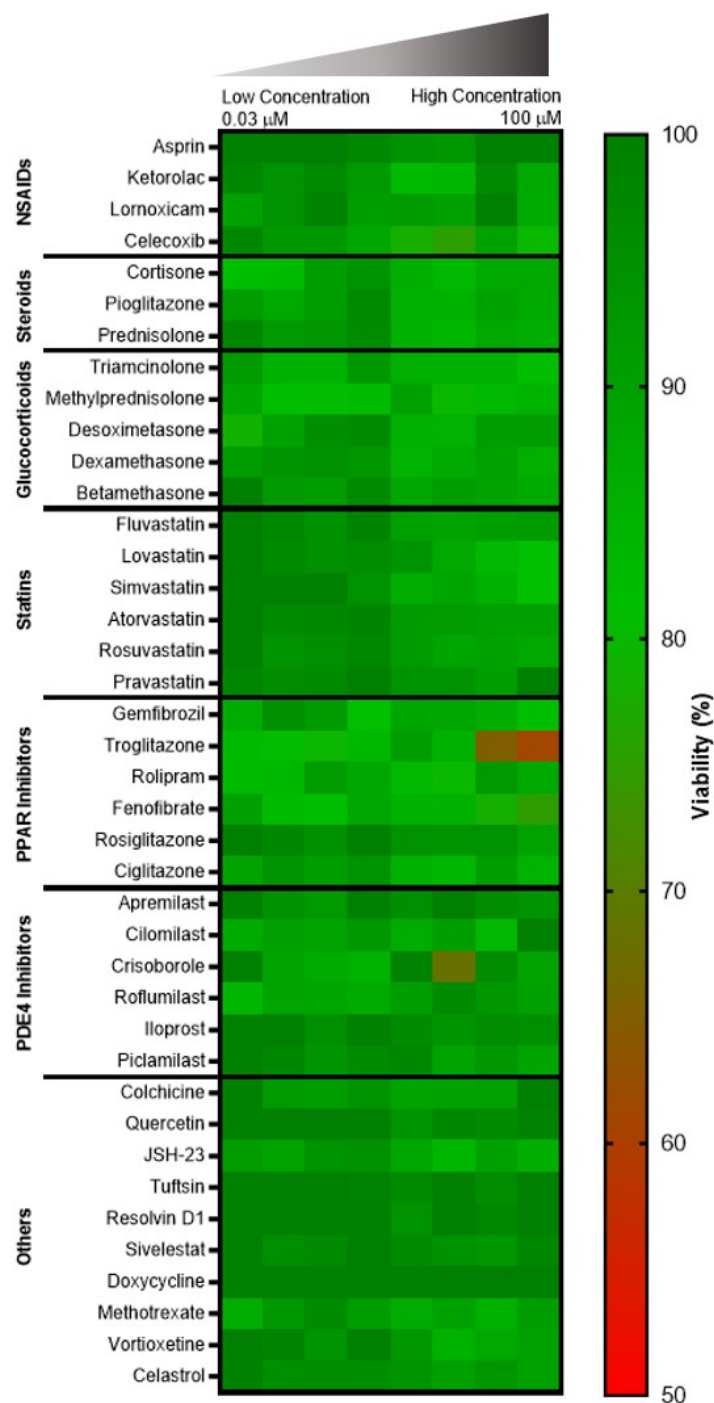

**Figure S6.** Cytotoxicity assessment of drug compounds. RAW264.7 cells were treated with indicated drug, spanning a dose-response from 100 μM to 31.6 nM in half-log titration. Heat map represents cell viability, as determined by PrestoBlue™ following normalization to untreated control wells. Data represent the mean of n = 3 independent samples.

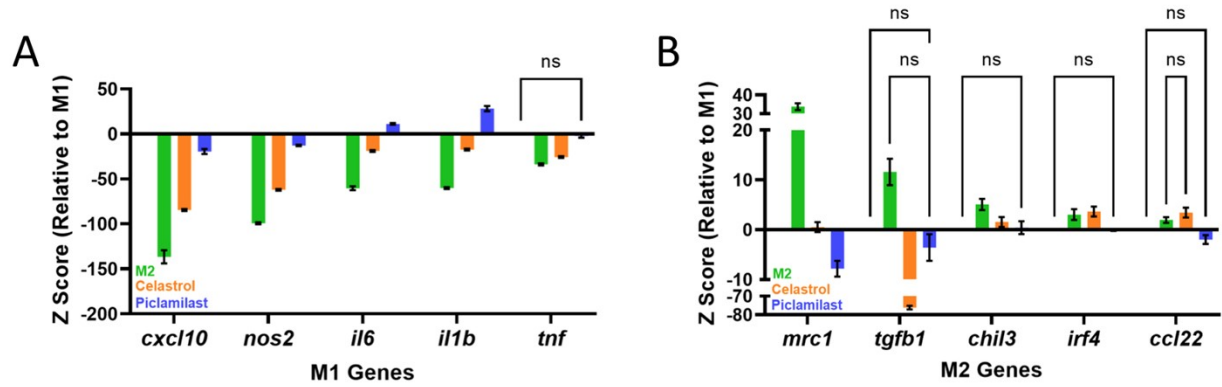

**Figure S7.** Expression of M1-associated (**A**) and M2-associated (**B**) genes following treatment by celastrol (orange) or piclamilast (blue) in BMDMs. M2 controls (green) are included for reference;  $p < 0.05$  for all comparisons unless indicated (ns = not significant). Results represent the group Z-score relative to M1-like controls; mean  $\pm$  SD,  $n = 3$ .



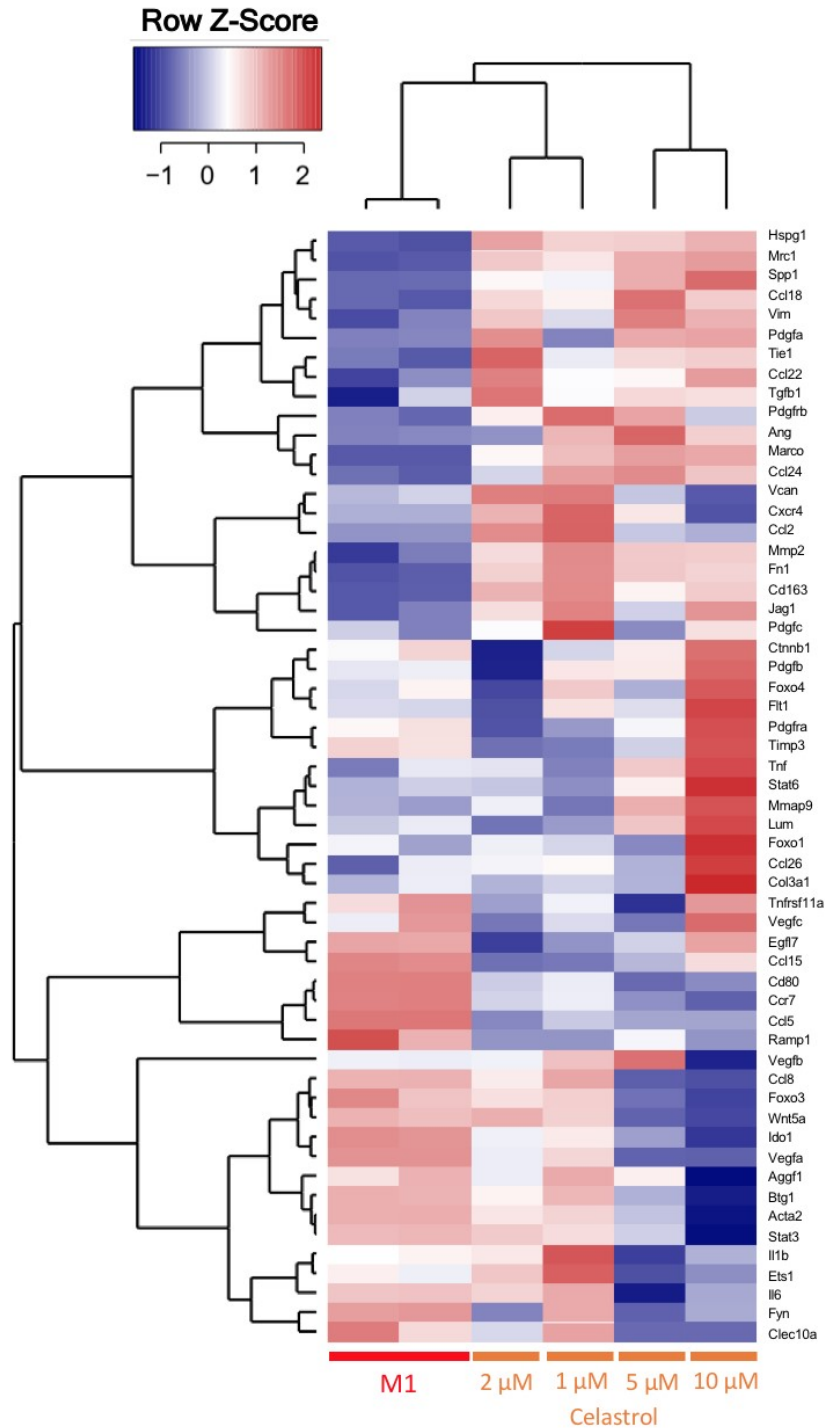

**Figure S8.** Heatmap of expressed genes represented as the row Z-score of log-transformed normalized data. Genes that were not expressed above background are excluded from presentation. Human monocyte-derived MF were subject to celastrol treatment at varying doses concurrent with LPS activation (100 ng/mL). M1 controls are included for reference. Low (1, 2  $\mu$ M) doses clustered similarly, while higher doses (5, 10  $\mu$ M) further diverged from M1 transcriptional profiles.

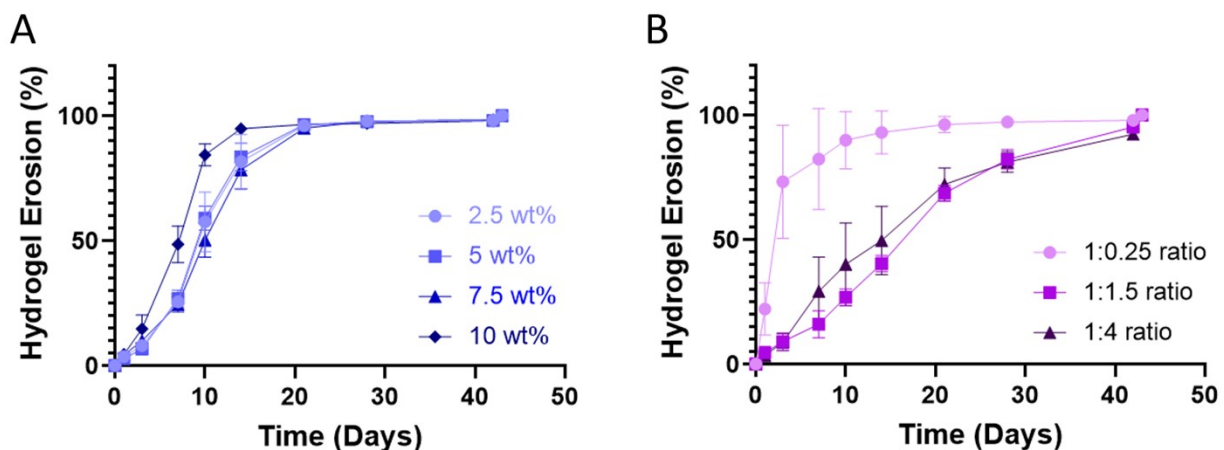

**Figure S9.** Hydrogel erosion is dependent on polymer concentration and the ratio of guest-to-host components. Hydrogel erosion occurred over a period of greater than one month, with minimal dependence on polymer concentration (A; 82 kDa Ad-HA (Low); 2.5-10%<sub>w/v</sub>) and a more pronounced dependence on the volumetric ratio of Ad-HA-to-CDNP (B; 82 kDa Ad-HA (High); 1:0.25-1:4 ratio). Data represent the mean  $\pm$  SD, n = 4.

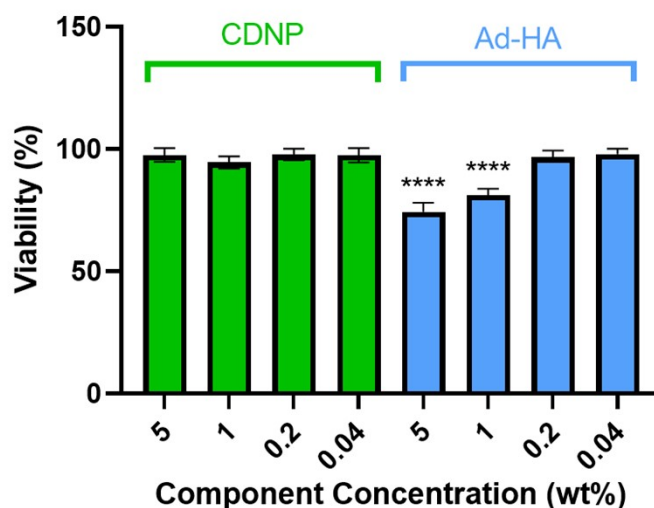

**Figure S10.** Cell viability in response to guest and host hydrogel components. Cells were assessed by PrestoBlue™ after 24 hrs of exposure to the individual components (CDNP or 82 kDa Ad-HA (High)) dissolved in media at varying concentrations. Data represent the mean  $\pm$  SD, n = 3, \*\*\*\*p value < 0.0001 relative to untreated controls.

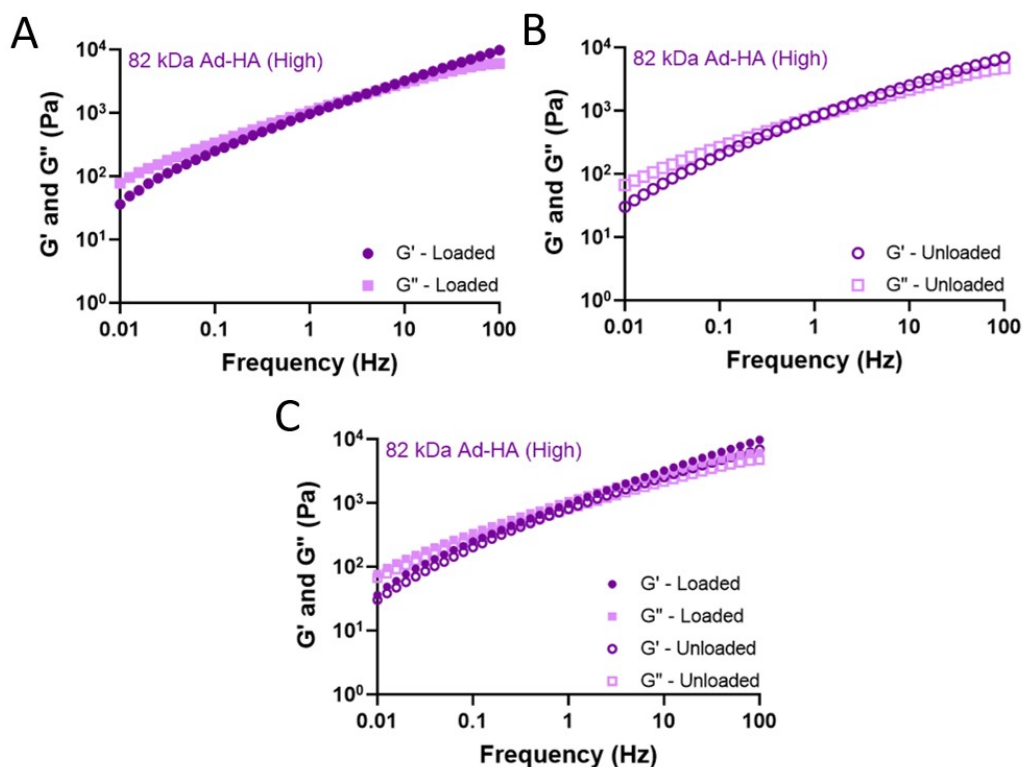

**Figure S11.** Representative oscillatory frequency sweeps of drug loaded (**A**, closed symbol) and unloaded (**B**, open symbol) hydrogels, and overlaid response (**C**) for 82 kDa Ad-HA (High) at a 1:1.5 Ad-HA:CDNP ratio;  $G'$  (dark purple),  $G''$  (light purple).

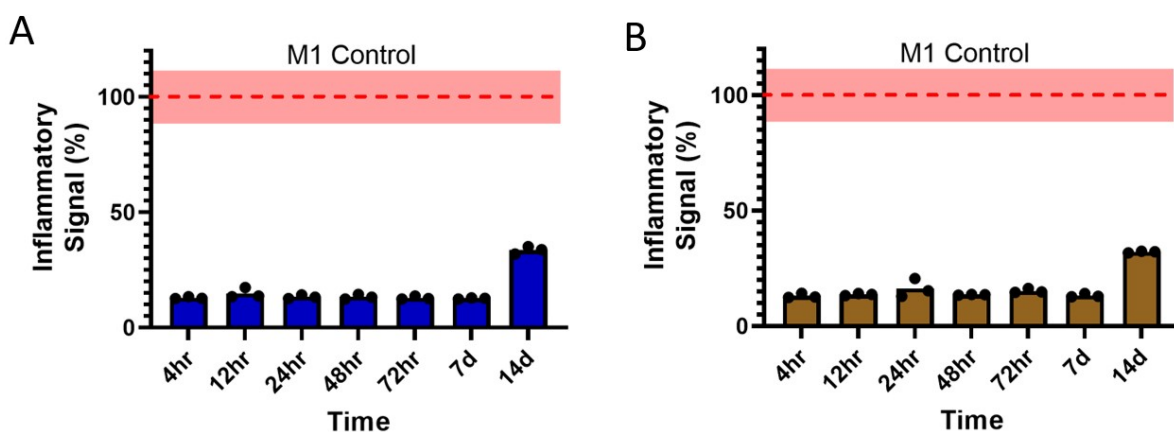

**Figure S12.** Anti-inflammatory activity of drug release samples performed in RAW-Blue™ cells by concurrent zymosan stimulation (100  $\mu\text{g}/\text{mL}$ ) and treatment with conditioned media from (**A**) 82 kDa Ad-HA (Low) and (**B**) 337 kDa Ad-HA (Low) hydrogels;  $p$  value  $< 0.0001$  for all samples relative to zymosan-treated controls (dashed line, red). Data represent the mean  $\pm$  SD,  $n = 3$ .

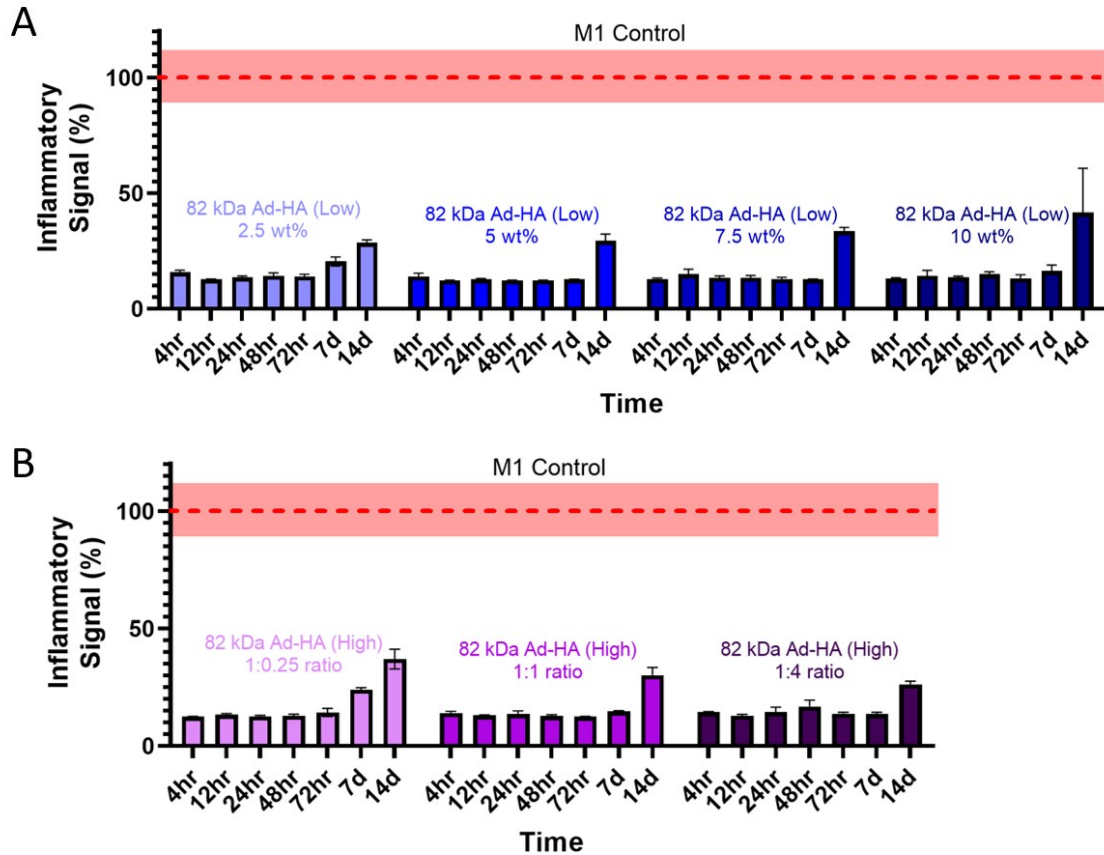

**Figure S13.** Anti-inflammatory activity of drug release samples performed in RAW-Blue™ cells by concurrent zymosan stimulation (100 µg/mL) and treatment with conditioned media from **(A)** 82 kDa Ad-HA (Low) hydrogels at varying concentrations of Ad-HA and **(B)** 82 kDa Ad-HA (High) hydrogels at varying ratios of Ad-HA:CDNP; p value < 0.0001 for all samples relative to zymosan-treated controls (dashed line, red). Data represent the mean ± SD, n = 3.
